# Supplementary material
Source: publisher site journal article supplement (https://www.spandidos-publications.com/3009/downloadSupplementary)
Supplement: Supplementary file 1 [file downloadSupplementary]

## Sheet: Rapid Antibody_Antigen Tests
Table SII. Rapid antigen and rapid antibody tests currently approved by international agencies and their main technical features.
Kit name	Type	Type of specimen	Sensitivity	Specificity	LoD	Company/Supplier	Website	Time
BD VeritorTM System for Rapid Detection of SARS-CoV-2	Immunochromatography assay	Nasopharyngeal - oropharyngeal swab	0.84	1	1.4x102 TCID50/ml	Becton, Dickinson and Company, BD Life Sciences	https://www.bd.com	15 min
RapiGen Biocredit COVID-19 Ag One 90 Step SARS-CoV-2	Immunochromatography assay	Nasopharyngeal swab	0.9002	1	N/A	RapiGEN Inc., Anyang-si, Gyeonggi- do, Republic of Korea	http://rapigen-inc.com	5-8 min
Lumipulse® G SARS-CoV-2 Ag	Chemiluminescent enzyme immunoassay	nasopharyngeal swab or saliva	N/A	N/A	N/A	Fujirebio	https://www.fujirebio.com	<35 min
Coris COVID-19 Ag Respi-Strip	Immunochromatography assay	Nasopharyngeal swab	Dry swabs, 91.2%	Dry swabs, 99.4%	3x104 pfu/ml	Coris BioConcept	https://www.corisbio.com	15-30 min
			Universal transport medium, 60.01%	Universal transport medium, 99%
LumiraDx SARS-CoV-2 Ag Test	Microfluidic immunofluorescence assay	Nasal Swab	0.976	0.966	32x102 TCID50/ml	LumiraDx UK Ltd	https://www.lumiradx.com	12 min
Abbott Panbio COVID-19 Ag Rapid Test	Immunochromatography assay	Nasopharyngeal swab	0.914	0.998	2.5x101.8 TCID50/ml	Abbott Rapid Diagnostics	https://www.globalpointofcare.abbott	15 min
Standard Q COVID-19 Ag Test	Immunochromatography assay	Nasopharyngeal swab	0.955	0.992	Direct nasopharyngeal swabs, 3.12x1022 TCID50/ml	SDbiosensor Inc.	http://sdbiosensor.com	15-30 min
					Nasopharyngeal swabs stored in VTM, 5x1022 TCID50/ml
Standard F COVID-19 Ag FIA	Fluorescent immunoassay	Nasopharyngeal swab	N/A	N/A	N/A	SDbiosensor Inc.	http://sdbiosensor.com	15 min
Quidel, SARS Ag Test with Sofia 2 device	Fluorescent immunoassay	Direct nasal/nasopharyngeal swab	0.967	1	1.13x102 TCID50/ml	Quidel Corporation	https://www.quidel.com	15 min
Flowflex™ SARS-CoV-2 Antigen Rapid Test	Immunochromatography assay	Nasal swab	0.971	0.996	1.6x102 TCID50/ml	ACON Laboratories, Inc.	https://www.aconlabs.com	15 min
AMP Rapid Test SARS-CoV-2 Ag	Immunochromatography assay	Nasopharyngeal swab	0.973	1	1.15x102 TCID50/ml	AMEDA Labordiagnostik GmbH	https://www.amp-med.com	15 min
Bioeasy 2019-nCoV Ag Fluorescence Rapid Test Kit	Fluorescence immunochromatographic assay	Nasal Swab - deep sputum	0.9171	1	N/A	Shenzhen Bioeasy Biotechnology Co.,Ltd.	http://en.bioeasy.com	10 min
Nano-CheckTM COVID-19 Antigen Test	Immunochromatography assay	Nasopharyngeal swab	0.85	1	N/A	Nano-Ditech Corporation	http://www.nanoditech.com	15 min
COVID-19 Ag Test Kit	Immunochromatography assay	Nasopharyngeal swab or nasal swab	0.9	0.98	8x102 TCID50/ml	Guangdong Wesail Biotech Co., Ltd.	http://en.wesailbio.com	<20 min
VTRUST COVID-19 Antigen Rapid test	Immunochromatography assay	Nasopharyngeal swab	0.917	0.99	1.26x102 TCID50/ml	TaiDoc Technology Corporation	https://taidoc.com	15 min
Rapid Test Ag 2019-nCoV	Immunochromatography assay	Nasopharyngeal swab	0.9556	0.9956	N/A	ProGnosis Biotech	https://www.prognosis-biotech.com	15 min
FREND™ COVID-19 Ag	Fluorescence immunoassay	Nasopharyngeal swab	0.9412	1	1.47x102 TCID50/ml	NanoEntek Inc	http://www.nanoentek.com	<3 min
SARS-CoV-2 ANTIGEN RAPID TEST KIT	Fluorescence immunochromatographic assay	Nasopharyngeal swab	0.9765	0.996	<50 TCID50/ml	BIOHIT Healthcare (Hefei) Co., Ltd.	https://www.biohit.cn	15 min
Lod, limit of detection; TCID50, median tissue culture infectious dose.
